# Supplementary material for: Comparison of Gonadotropin-Releasing Hormone versus Estrogen-Based Fixed-Time Artificial Insemination Protocols in Grazing Bos taurus Suckled Beef Cows
Source: MDPI journal article supplement (doi:10.3390/ani13172803), 2023-09-04
Supplement: s1 [file s1]

**Table S1.** Reproductive outcomes and BCS assessment according to fixed-time artificial insemination (FTAI) protocols.

|                                      |                 | Experiment 1 <sup>a</sup> |            |            |            | Experiment 2 <sup>b</sup> |            |            |            |
|--------------------------------------|-----------------|---------------------------|------------|------------|------------|---------------------------|------------|------------|------------|
| FTAI Protocols                       |                 | 7-Day                     | 7-Day      | 7 & 7      | 7 & 7      | 6-Day                     | 7-Day      | 7-Day      | 7 & 7      |
|                                      |                 | Estradiol                 | GnRH       | Estradiol  | GnRH       | Estradiol                 | Estradiol  | GnRH       | GnRH       |
| <b>Total cows</b>                    | n               | 59                        | 59         | 60         | 57         | 116                       | 115        | 116        | 115        |
| <b>BCS<sup>1</sup></b>               |                 | 3.70                      | 3.68       | 3.66       | 3.71       | 2.79                      | 2.81       | 2.80       | 2.8        |
| <b>Ovarian status<sup>2</sup></b>    | Cycling, n (%)  | 38 (64.4)                 | 38 (64.4)  | 37 (61.6)  | 38 (66.6)  | 58 (50.1)                 | 58 (50.4)  | 57 (49.1)  | 59 (51.3)  |
|                                      | No-CL/LF, n (%) | 17 (28.8)                 | 17 (28.8)  | 20 (33.3)  | 16 (28.1)  | 33 (28.4)                 | 31 (26.9)  | 32 (27.5)  | 30 (26.0)  |
|                                      | No-CL/SF, n (%) | 4 (6.7)                   | 4 (6.7)    | 3 (5.0)    | 3 (5.2)    | 25 (21.5)                 | 26 (22.7)  | 27 (23.2)  | 26 (22.6)  |
| <b>Presence of CL<sup>3</sup></b>    | n (%)           | 34 (57.6)                 | 54 (91.5)  | 52 (86.6)  | 56 (98.2)  | --                        | --         | --         | --         |
| <b>Estrus expression<sup>4</sup></b> | Yes, n (%)      | 39 (66.1)                 | 47 (79.7)  | 45 (75.0)  | 46 (80.8)  | 96 (82.8)                 | 97 (84.3)  | 99 (85.3)  | 103 (89.6) |
|                                      | No, n (%)       | 20 (33.9)                 | 12 (20.3)  | 15 (25.0)  | 11 (19.2)  | 20 (17.2)                 | 18 (15.7)  | 17 (14.7)  | 12 (10.4)  |
| <b>Pregnant cows<sup>5</sup></b>     | n (%)           | 29 (49.1%)                | 36 (61.0%) | 20 (33.3%) | 41 (71.9%) | 65 (56.0%)                | 59 (51.3%) | 61 (52.5%) | 78 (67.8%) |
| <b>BCS difference<sup>6</sup></b>    |                 | -0.9                      | -0.88      | -0.86      | -0.89      | 0.29                      | 0.33       | 0.33       | 0.34       |

<sup>a,b</sup> Within a row and Experiment, values with different superscripts differ ( $P < 0.05$ ).

<sup>a</sup> FTAI protocols: 7-Day Estradiol = cows were administrated 2 mg of estradiol benzoate (EB) + IVPD insert on Day -9 and 1 mg of estradiol cypionate (ECP) + IVPD removal on Day -2, 7-Day GnRH = cows received 10 µg of GnRH + IVPD insert on Day -10, IVPD removal on Day -3 and GnRH at the time of FTAI, 7 & 7 Estradiol = cows were administrated PG + IVPD insert on Day -16, EB on Day -9 and IVPD removal + ECP on Day -2, and 7 & 7 GnRH = cows received PG + IVPD insert on Day -17, GnRH on Day -10, IVPD removal on Day -3

and GnRH at the time of FTAI.

<sup>b</sup> FTAI protocols: 6-Day Estradiol = cows were administrated EB + IVPD insert on Day -9, IVPD removal on Day -3 and GnRH at the time of FTAI. The 7-Day Estradiol, 7-Day GnRH and 7 & 7 GnRH protocols as described for Experiment 1.

<sup>1</sup> Initial BCS assessment at initiation of FTAI protocol (scale 1 to 5 as described by [1]).

<sup>2</sup> Based on ultrasonographic examination before the initiation of FTAI protocols. Cows with a CL were considered to be cycling, cows without a CL and with a follicle  $\geq 10$  mm were considered no-CL with large follicles (No-CL/LF), and cows without a CL and with follicles  $< 10$  mm were considered no-CL with small follicles (No-CL/SF).

<sup>3</sup> Presence of at least one CL determined by ultrasonography at the time of IVPD insert removal.

<sup>4</sup> Based on tail paint score at the time of FTAI. Yes =  $\geq 50\%$  of paint rubbed off; and No =  $< 50$  of paint rubbed off.

<sup>5</sup> Pregnancy status determined by transrectal ultrasonography 35 to 45 d after FTAI.

<sup>6</sup> BCS difference between the 1<sup>st</sup> assessment (initiation of FTAI protocol) and the 2<sup>nd</sup> assessment (pregnancy diagnosis).
